# Supplementary material for: Strain-Dependent Inhibition of Erythrocyte Invasion by Monoclonal Antibodies Against Plasmodium falciparum CyRPA
Source: PubMed Central journal article supplement (PMC8383283; doi:10.3389/fimmu.2021.716305), 2021-08-10
Supplement: Image_3.pdf [file Image_3.pdf]

| <b>mAb combination and ratio</b> | <b>Combination Index</b> |
|----------------------------------|--------------------------|
| CyP1.9 & CyP2.38 (4:1)           | 0.060                    |
| CyP1.9 & CyP2.38 (3:2)           | 0.055                    |
| CyP1.9 & CyP2.38 (2:3)           | 0.056                    |
| CyP1.9 & CyP2.38 (1:4)           | 0.072                    |
|                                  |                          |
| CyP1.9 & CyP2.39 (4:1)           | 0.79                     |
| CyP1.9 & CyP2.39 (3:2)           | 2.17                     |
| CyP1.9 & CyP2.39 (2:3)           | 3.54                     |
| CyP1.9 & CyP2.39 (1:4)           | 2.80                     |
|                                  |                          |
| CyP2.38 & CyP2.39 (4:1)          | 0.104                    |
| CyP2.38 & CyP2.39 (3:2)          | 0.087                    |
| CyP2.38 & CyP2.39 (2:3)          | 0.087                    |
| CyP2.38 & CyP2.39 (1:4)          | 0.104                    |
